# Supplementary material for: Role of Zinc Homeostasis in the Pathogenesis of Diabetes and Obesity
Source: PubMed Central journal article supplement (PMC5855698; doi:10.3390/ijms19020476), 2018-02-06
Supplement: ijms-19-00476-s001.pdf [file ijms-19-00476-s001.pdf]

Table 1. Summary of ZnT8-KO mouse studies

| Study                    | Deletion location  | Deletion strategy | Genetic background | Crystalization of insulin granules | Proinsulin concentration | Glucose intolerance   | Glucose-stimulated insulin secretion | Insulin level in vivo |
|--------------------------|--------------------|-------------------|--------------------|------------------------------------|--------------------------|-----------------------|--------------------------------------|-----------------------|
| Nicolson et al. (2009)   | Whole body         | Exon 1            | Mixed              | granule/ rod-shaped cores          | Unchanged                | Impaired (only males) | Increased                            | Impaired              |
| Pound et al. (2009)      | Whole body         | Exon 3            | Mixed              | Not examined                       | Not examined             | Normal                | Decreased                            | Impaired              |
| Lemaire et al. (2009)    | Whole body         | Exon 1            | Mixed              | Loss of dense core granule         | Unchanged                | Normal                | Unchanged                            | Unchanged             |
| Wijesekara et al. (2010) | specific (Ins2Cre) | Exon 1            | Mixed              | granule/ rod-shaped cores          | Increased                | Impaired              | Decreased                            | Unchanged             |
| Pound et al. (2012)      | Whole body         | Exon 3            | C57BL/6J           | Unchanged                          | Decreased                | Impaired              | Decreased                            | Unchanged             |
| Tamaki et al. (2013)     | specific (Ins2Cre) | Exon 5            | C57BL/6J           | Loss of dense core granules        | Increased                | Impaired              | Increased                            | Impaired              |
| Mitchell et al. (2016)   | specific (Ins1Cre) | Exon 1            | C57BL/6J           | granule/ rod-shaped cores          | Not examined             | Impaired              | Unchanged                            | Impaired              |
